1 **Title:**

2 The intracellular symbiont *Wolbachia* enhances recombination in a dose-dependent manner

3 **Author List:** Kaeli N. Bryant<sup>1</sup>, Irene L.G. Newton<sup>1\*</sup>

4 \*corresponding author

5 1 = Department of Biology, Indiana University, Bloomington, IN 47405

6

7 **Article Summary:**

8 The ubiquitous bacterial symbiont *Wolbachia* is known to alter host reproduction through  
9 manipulation of host cell biology, protect from pathogens, and supplement host nutrition. In  
10 this work we show that *Wolbachia* specifically increases host recombination in a dose  
11 dependent manner. Flies harboring *Wolbachia* exhibit elevated rates of recombination across  
12 the 2<sup>nd</sup> and X chromosomes and this increase is proportional to their *Wolbachia* load. In  
13 contrast, another intracellular symbiont, *Spiroplasma*, does not lead to an increase in  
14 recombination across the intervals tested. Our results point to a specific effect of *Wolbachia*  
15 infection that may have a significant effect on infected insect populations.

16 **Key Words:**

17 *Wolbachia*, recombination, *Drosophila*

18 **Abstract**

19 *Wolbachia pipientis* is an intracellular alphaproteobacterium that infects 40-60% of insect  
20 species and is well known for host reproductive manipulations. Although *Wolbachia* are  
21 primarily maternally transmitted, evidence of horizontal transmission can be found in  
22 incongruent host-symbiont phylogenies and recent acquisitions of the same *Wolbachia* strain  
23 by distantly related species. Parasitoids and predator-prey interactions may indeed facilitate  
24 the transfer of *Wolbachia* between insect lineages but it is likely that *Wolbachia* are acquired  
25 via introgression in many cases. Many hypotheses exist as to explain *Wolbachia* prevalence and  
26 penetrance such as nutritional supplementation, protection from parasites, protection from  
27 viruses, or straight up reproductive parasitism. Using classical genetics we show that *Wolbachia*  
28 increase recombination in infected lineages across two genomic intervals. This increase in  
29 recombination is titer dependent as the wMelPop variant, which infects at higher load in  
30 *Drosophila melanogaster*, increases recombination 5% more than the wMel variant. In addition,  
31 we also show that *Spiroplasma poulsonii*, the other bacterial intracellular symbiont of  
32 *Drosophila melanogaster*, does not induce an increase in recombination. Our results suggest  
33 that *Wolbachia* infection specifically alters host recombination landscape in a dose dependent  
34 manner.

35 **Introduction:**

36 Recombination, the exchange of genetic material during meiosis is thought to be largely  
37 beneficial, as it increases the efficacy of natural selection<sup>1,2</sup>. Because of chromosome  
38 architecture, loci that are physically linked to each other can interfere with selection such that  
39 selection at one locus reduces the effective population size, and therefore the efficacy of  
40 selection, at linked loci. This phenomenon, termed “Hill-Robertson interference,” means that  
41 positive or negative selection at one site can interfere with selection at another site. By  
42 allowing loci to shuffle between chromosomes, recombination mitigates Hill-Robertson  
43 interference<sup>3</sup>. As a result of this re-shuffling, areas of the genome subject to high  
44 recombination rates show higher nucleotide diversity, either because of the inherent  
45 mutagenic effect of recombination or by the indirect influence of recombination on natural  
46 selection in a population. Overall, a large body of literature supports the assertion that  
47 recombination increases efficacy of selection and enhances adaptation in animals, as studied in  
48 various *Drosophila* species<sup>1-3</sup>.

49 One factor that may influence recombination is bacterial infection. For example, injection of  
50 flies with the bacterial pathogen *Serratia* increases recombination post infection<sup>4</sup>. Many  
51 *Drosophila* species are colonized persistently by *Wolbachia pipientis*, an alpha-proteobacterium  
52 within the *Rickettsiales* and the most common infection on the planet, found in 40-60% of all  
53 insects. *Wolbachia*'s prevalence in populations is likely modulated by its reproductive  
54 manipulations, induced to benefit infected females<sup>5</sup>. However, this reproductive parasitism  
55 alone is not sufficient to explain *Wolbachia* infection prevalence; indeed there are many  
56 recently discovered, insect infecting strains which do not seem to induce any reproductive  
57 phenotype at all, suggestive of other potential benefits provided by the symbiont<sup>6-8</sup>. One  
58 known benefit is pathogen blocking, where *Wolbachia* repress the virus replication within the  
59 insect host<sup>9-11</sup>. This phenomenon has important implications for the use of *Wolbachia* in vector  
60 control<sup>12</sup>. In addition to protecting its host from pathogens, *Wolbachia* also generally improves  
61 the fitness and fecundity of some hosts, and removal of the endosymbiont can cause a  
62 decrease in host fitness (Fry and Rand '02; Fry et al. '04). Finally, *Wolbachia* can rescue  
63 oogenesis defects in mutant *Drosophila* strains<sup>13</sup> and has also made itself a necessary  
64 component of oogenesis in some wasp species, thereby making the infection indispensable<sup>14</sup>.

65 One recently discovered phenotype of *Wolbachia* is that it may increase the amount of  
66 recombination events on the X chromosome, but not on the 3<sup>rd</sup>, in *Drosophila melanogaster*  
67<sup>15,16</sup>. This phenotype contrasts with that observed for *Serratia* infection, where elevated  
68 recombination was observed on the 3<sup>rd</sup> chromosome<sup>4</sup>. Does *Wolbachia* infection actually lead  
69 to increased recombination? If so, would any infection of the reproductive tract result in  
70 increased recombination? Here we answer these questions using classical genetics in  
71 *Drosophila melanogaster* with different *Wolbachia* variants and using another intracellular  
72 symbiont, *Spiroplasma poulsonii*. We confirm that *Wolbachia* significantly increases  
73 recombination across two intervals, one on the X and one on the 2<sup>nd</sup> chromosome, but we

74 could not detect any effect on the 3<sup>rd</sup> chromosome interval queried. In addition, there is a clear  
75 correlation between *Wolbachia* load and recombination events, suggesting *Wolbachia* itself is  
76 the cause of the elevated recombination; clearing the host of *Wolbachia* restores  
77 recombination rate to a basal level while infection with a high-titer variant increases  
78 recombination. Another intracellular symbiont, *Spiroplasma*, does not increase recombination  
79 rate, suggesting this phenomenon is not simply due to the presence of a bacterial infection in  
80 the gonads, but is *Wolbachia* specific. These results suggest that *Wolbachia* specifically elevates  
81 host recombination, providing a previously unknown benefit to its host.

## 82 **Results:**

### 83 *Wolbachia* infection increases host recombination rate

84 We reasoned that if *Wolbachia* infected flies exhibited increased recombination rate, this  
85 would be evident in natural populations. We took advantage of a set of isogenized flies,  
86 sampled from a wild-caught population in North Carolina, the *Drosophila* Genetic Reference  
87 Panel<sup>17</sup>. Virgin females from two backgrounds (DGRP-320, infected with *Wolbachia* and DGRP-  
88 83, *Wolbachia*-free) were crossed independently to three different lines carrying chromosomal  
89 markers, allowing us to distinguish recombinants along certain genomic intervals based on  
90 presence of dominant markers (**Fig. 1**). These lines were y[1] v[1] (BDSC stock #1509) for the X  
91 chromosome, carrying *yellow* and *vermillion*; vg[1] bw[1] (stock #433) for the 2<sup>nd</sup> chromosome,  
92 carrying *vestigial wings* and *brown*, and e[4] wo[1] ro[1] (stock #496) for the 3<sup>rd</sup> chromosome,  
93 carrying *ebony* and *rough*.

94 As a control, we also cleared the *Wolbachia* infection from line DGRP-320 by rearing the flies on  
95 tetracycline for 3 generations and then repopulating the extracellular microbiome for 1  
96 generation. When we compared *Wolbachia* infected and tetracycline cleared individuals,  
97 controlling for genetic background, we observed a statistically significant increase in  
98 recombination in F2 progeny derived from *Wolbachia*-infected mothers (**Fig. 2**). Specifically, for  
99 the X and 2<sup>nd</sup> chromosomes we observed an increase in mutation rate of 6.4% and 6.1%,  
100 respectively. No statistically significant effect of *Wolbachia* infection was observed on the 3<sup>rd</sup>  
101 chromosome (df = 14,  $\chi^2 = 0.080$ , p = 0.77). It may be that this difference in recombination rate  
102 across chromosomes reflects the natural variation in recombination observed across genomic  
103 intervals for *Drosophila*, or may be an artifact of the genomic interval sampled and not an  
104 influence of *Wolbachia* on specific chromosomes.

### 105 *Dose dependent effect of Wolbachia on host recombination rate*

106 Because we observed a strong influence of *Wolbachia* infection status on host recombination  
107 rate, we sought to modulate infection status by using high titer *Wolbachia* infections in our  
108 experiment. *Wolbachia* colonize *Drosophila* at different titers depending on the amplification of  
109 a specific genomic interval in the *Wolbachia* genome termed “octomom”<sup>18</sup>. We crossed  
110 females carrying the highest titer, pathogenic *Wolbachia* variant, wMelPop,  
111 (w[1118]/Dp(1;Y)y[+] | *Wolbachia*-wMelpop; BDSC stock #65284), with males of stock DGRP-

112 320. Lines were introgressed for 3 generations within the #DGRP-320 genetic background  
113 before use in experiments. We looked specifically at the X chromosome intervals as we had  
114 already established that *Wolbachia* significantly increased recombination across that genomic  
115 interval (**Fig. 2**). Again, we observed a significant effect of *Wolbachia* infection on  
116 recombination rate in this experiment (one-way ANOVA;  $df = 15$ ,  $\chi^2 = 15.14$ ,  $p = 0.015$ ) (**Fig. 3**).  
117 Interestingly, we observed a significant effect of *Wolbachia* titer on recombination rate – the  
118 high titer wMelPop variant increases recombination on the X chromosome in F2 progeny by  
119 9.5% compared to the 6.3% observed for wMel ( $df = 11$ ,  $\chi^2 = 12.65$ ,  $p = 0.044$ ) (**Fig. 3**).

#### 120 *Spiroplasma* does not increase host recombination rate

121 We hypothesized that *Wolbachia* may be a stress on the host cell, increasing recombination  
122 rate as a result of increased reactive oxygen species or other immune activation pathways. We  
123 therefore reasoned that any bacterial infection may increase recombination rate. To test this  
124 hypothesis, we procured *Spiroplasma poulsonii* MSRO (a gift from John Jaenike), which we used  
125 to infect a *Wolbachia*-free OreR lab stock (Oregon-R-modENCODE, BDSC #25211). We used the  
126 same crossing scheme as above to introduce *Spiroplasma* into the  $y[1] v[1]$  background,  
127 carrying phenotypic markers on the X chromosome. As a genetic control, we used stock  
128 #25211. Counter to our hypothesis, we observed no significant increase in recombination based  
129 on *Spiroplasma* infection (**Fig. 4**).

#### 130 **Discussion:**

131 For sexually reproducing organisms, recombination is both a source of genetic diversity within a  
132 population and a mechanism by which to decouple differential selection on sites across the  
133 chromosome. Therefore, recombination is thought to be beneficial. Here, we observed that  
134 *Wolbachia* infection significantly increased the recombination rate observed across two  
135 genomic intervals (for both the X and the 2<sup>nd</sup> chromosome). Importantly, two lines of evidence  
136 presented here support the hypotheses that this increase is *Wolbachia* specific: we observed a  
137 dose dependency to the recombination rate and we did not identify a significant effect of  
138 *Spiroplasma* infection on recombination rate. Recombination rates vary dramatically across  
139 animals, even within a genus, as best illustrated within the *Drosophila* clade<sup>19,20</sup>. The  
140 mechanism behind this difference is not well understood but our data suggest that the  
141 symbiont *Wolbachia* may influence recombination rate of infected *Drosophila*. This result  
142 suggests a previously unknown benefit to *Wolbachia* infection and may help explain the  
143 prevalence of *Wolbachia* in certain insect populations.

144 The mechanism by which *Wolbachia* infection elevates recombination is an active area of  
145 inquiry in our lab. *Wolbachia* have an active type IV secretion system that they use to secrete  
146 proteins into the host and modulate host cell biology. It is possible that some of these proteins  
147 may influence recombination rate directly or indirectly, although no effectors have yet been  
148 identified that bind to host DNA. Here we used two different *Wolbachia* variants to support the  
149 hypothesis that *Wolbachia* increases host recombination rate. However, it is possible that

150 strains outside of the wMel clade do not increase host recombination and a comparative  
151 genomic framework could be used to identify loci in *Wolbachia* that confer the phenotype.  
152 Finally, a recent publication suggested *Wolbachia* wMel infected *Drosophila* prefer cooler  
153 temperatures<sup>21</sup>. Increases in temperature modulate recombination in *Drosophila*<sup>22</sup> and it is  
154 possible that *Wolbachia* infection elevates host temperature enough to generate an increase in  
155 the number of detected recombinants, in a laboratory setting where flies are kept at a constant  
156 temperature.

157 *Wolbachia* is known for its ability to transfer between species. This process can occur through  
158 horizontal transmission of the strain or through introgression via hybridization<sup>23</sup>. One  
159 particular strain, wRi, has been identified as having globally spread across highly divergent  
160 *Drosophila* species, and in a few cases, instances of introgression between species are known to  
161 have facilitated this transfer<sup>23</sup>. *Wolbachia* facilitates its own maintenance in populations  
162 through reproductive manipulations<sup>5</sup> and potentially through mutualistic benefits offered to  
163 the host<sup>6,11</sup>. *Wolbachia* has been shown to facilitate divergence of hosts, through manipulation  
164 of sperm-egg compatibility, strengthening species boundaries<sup>24</sup>. It is therefore tempting to  
165 suggest, based on these results, that *Wolbachia* may also increase introgression between  
166 species to facilitate their own spread. This hypothesis, however, awaits further research.

167

#### 168 **Acknowledgements:**

169 We would like to thank anonymous reviewers for their feedback. We also thank MaryAnn  
170 Martin for their assistance and guidance throughout the course of this project and Nadia Singh  
171 for discussions at earlier stages of data analysis. This work was funded in part by the National  
172 Science Foundation (NSF 1456545 to ILGN).

173

#### 174 **Author contributions:**

175 ILGN and KBS conceived of the project, ILGN, and KBS implemented the experiments, and wrote  
176 the manuscript.

177

#### 178 **Data and Reagent Availability**

179 *Drosophila* strains used in this work are publicly available through the Bloomington *Drosophila*  
180 Stock Center. *Spiroplasma* infected OreR is available from the Newton laboratory – please  
181 contact irnewton@indiana.edu.

#### 182 **Methods:**

183 *Fly Rearing*

184 Flies were ordered from the Bloomington Drosophila Stock Center. Three marker stocks were  
185 selected as recombination trackers for the X, 2<sup>nd</sup>, and 3<sup>rd</sup> chromosomes in *Drosophila*  
186 *melanogaster*: #1509, which is marked with *yellow* (*y*) and *vermillion* (*v*) on the X chromosome;  
187 #433, which is marked with *vestigial wings* (*vg*) and *brown* (*bw*) on the 2<sup>nd</sup> chromosome; and  
188 #496, which is marked with *ebony* (*e*) and *rough* (*ro*) on the 3<sup>rd</sup> chromosome. Two stocks, one  
189 *Wolbachia* infected and one uninfected, were selected at random from the Drosophila Genetic  
190 Reference Panel (DGRP): #29654 and #28134, respectively. To modulate infection status, we  
191 introduced high titer *Wolbachia* infections into our stock #29654 using the *Wolbachia* variant  
192 wMelPop from stock #65284. To clear #29654 of its infection, flies were raised on fly food  
193 containing 50 ug/mL tetracycline for 3 generations and the allowed to be recolonized by their  
194 extracellular microbiome, and recover from tetracycline, for 1 generation. All crosses were  
195 conducted at room temperature.

#### 196 *DNA Extraction and Polymerase Chain Reaction*

197 *Wolbachia* infection in #29654 was confirmed by PCR. DNA was extracted using a single-fly  
198 extraction method. Whole flies were ground with a pipette tip containing 50 microliters lysis  
199 buffer (10mM Tris-HCl pH 8.2, 1 mM EDTA, and 25 mM NaCl) and 5 microliters Proteinase K.  
200 They were incubated at room temperature for 20 minutes then heated to 95°C for 2 minutes to  
201 deactivate the enzyme. Polymerase chain reaction was performed on standardized quantities of  
202 extracted DNA. The cycling conditions are as follows: 98°C for 2 minutes, followed by 30 cycles  
203 of 98°C for 30 seconds, 59°C for 45 seconds, and 72°C for 1 minute 30 seconds, then finished  
204 with 72°C for 10 minutes. Primers used for this are as follows: wsp F1 5'-GTC CAA TAR STG ATG  
205 ARG AAA C -3' and wsp R1 5'- CYG CAC CAA YAG YRC TRT AAA -3'. Amplified *Wolbachia* DNA  
206 was visualized using agarose gel electrophoresis. Quantitative PCR was performed to confirm  
207 the titer difference in *Wolbachia* infection between wMel to wMelPop. Data were collected  
208 using an Applied Biosystems StepOne Real-time PCR system and iTaq universal SYBR Green  
209 supermix. The *Wolbachia* primers used are as follows: wspF 5'- CATTGGTGTGGTGGTGGTG -3'  
210 and wspR 5'- ACCGAAATAACGAGCTCCAG -3'. The host primers used are as follows: Rpl32F 5'-  
211 CCGCTTCAAGGGACAGTATC -3' and Rpl32R 5'- CAATCTCTTGCCTTCTTG -3'. The cycling  
212 conditions are as follows: 50°C for 2 minutes, 95°C for 10 minutes, followed by 40 cycles of  
213 95°C for 30 seconds and 59°C for 1 minute. The reaction was carried out in a 96-well plate.  
214 Gene expression was determined by the Livak and Pfaffl methods.

#### 215 *Recombination Assay*

216 To determine if recombination events had occurred, a two-step crossing method was devised,  
217 shown in Figure 1. Ten virgin DGRP females aged 3-5 days were housed with ten phenotypically  
218 marked males and were allowed to mate for 10 days, after which parentals were cleared from  
219 the bottle. Virgin female F1 progeny were collected and crossed to the male parental line in the  
220 same ratio as before and allowed to mate for 10 days before being cleared from the bottle. All  
221 F2 progeny from this cross were collected and frozen after 10 days of the clearing. Flies were  
222 scored according to their visible phenotypes and sorted into two groups. Significance between

223 phenotypically normal flies and flies that have undergone recombination was determined  
224 through ANOVA.

225



226

227 **References:**

- 228 1 Haddrill, P. R., Halligan, D. L., Tomaras, D. & Charlesworth, B. Reduced efficacy of  
229 selection in regions of the *Drosophila* genome that lack crossing over. *Genome Biol* **8**,  
230 R18, doi:10.1186/gb-2007-8-2-r18 (2007).
- 231 2 McGaugh, S. E. *et al.* Recombination modulates how selection affects linked sites in  
232 *Drosophila*. *PLoS Biol* **10**, e1001422, doi:10.1371/journal.pbio.1001422 (2012).
- 233 3 Presgraves, D. C. Recombination enhances protein adaptation in *Drosophila*  
234 *melanogaster*. *Curr Biol* **15**, 1651-1656, doi:10.1016/j.cub.2005.07.065 (2005).
- 235 4 Singh, N. D. *et al.* EVOLUTION. Fruit flies diversify their offspring in response to parasite  
236 infection. *Science* **349**, 747-750, doi:10.1126/science.aab1768 (2015).
- 237 5 Werren, J. H., Baldo, L. & Clark, M. E. Wolbachia: master manipulators of invertebrate  
238 biology. *Nat Rev Microbiol* **6**, 741-751, doi:10.1038/nrmicro1969 (2008).
- 239 6 Hamm, C. A. *et al.* Wolbachia do not live by reproductive manipulation alone: infection  
240 polymorphism in *Drosophila suzukii* and *D. subpulchrella*. *Mol Ecol* **23**, 4871-4885,  
241 doi:10.1111/mec.12901 (2014).
- 242 7 Zug, R. & Hammerstein, P. Bad guys turned nice? A critical assessment of Wolbachia  
243 mutualisms in arthropod hosts. *Biol Rev Camb Philos Soc* **90**, 89-111,  
244 doi:10.1111/brv.12098 (2015).
- 245 8 Hosokawa, T., Koga, R., Kikuchi, Y., Meng, X. Y. & Fukatsu, T. Wolbachia as a  
246 bacteriocyte-associated nutritional mutualist. *Proc Natl Acad Sci U S A* **107**, 769-774,  
247 doi:10.1073/pnas.0911476107 (2010).
- 248 9 Chrostek, E. *et al.* Wolbachia variants induce differential protection to viruses in  
249 *Drosophila melanogaster*: a phenotypic and phylogenomic analysis. *PLoS Genet* **9**,  
250 e1003896, doi:10.1371/journal.pgen.1003896 (2013).
- 251 10 Martinez, J. *et al.* Symbionts commonly provide broad spectrum resistance to viruses in  
252 insects: a comparative analysis of Wolbachia strains. *PLoS Pathog* **10**, e1004369,  
253 doi:10.1371/journal.ppat.1004369 (2014).
- 254 11 Teixeira, L., Ferreira, A. & Ashburner, M. The bacterial symbiont Wolbachia induces  
255 resistance to RNA viral infections in *Drosophila melanogaster*. *PLoS Biol* **6**, e2,  
256 doi:10.1371/journal.pbio.1000002 (2008).
- 257 12 O'Neill, S. L. The Use of Wolbachia by the World Mosquito Program to Interrupt  
258 Transmission of *Aedes aegypti* Transmitted Viruses. *Adv Exp Med Biol* **1062**, 355-360,  
259 doi:10.1007/978-981-10-8727-1\_24 (2018).
- 260 13 Starr, D. J. & Cline, T. W. A host parasite interaction rescues *Drosophila* oogenesis  
261 defects. *Nature* **418**, 76-79, doi:10.1038/nature00843 (2002).
- 262 14 Dedeine, F., Vavre, F., Shoemaker, D. D. & Boulétreau, M. INTRA-INDIVIDUAL  
263 COEXISTENCE OF A WOLBACHIA STRAIN REQUIRED FOR HOST OOGENESIS WITH TWO  
264 STRAINS INDUCING CYTOPLASMIC INCOMPATIBILITY IN THE WASP *ASOBARA TABIDA*.  
265 *Evolution* **58**, 2167-2174, doi:doi:10.1111/j.0014-3820.2004.tb01595.x (2004).



- 266 15 Hunter, C. M., Huang, W., Mackay, T. F. & Singh, N. D. The Genetic Architecture of  
267 Natural Variation in Recombination Rate in *Drosophila melanogaster*. *PLoS Genet* **12**,  
268 e1005951, doi:10.1371/journal.pgen.1005951 (2016).
- 269 16 Singh, N. D. Wolbachia Infection Associated with Increased Recombination in  
270 *Drosophila*. *G3 (Bethesda)* **9**, 229-237, doi:10.1534/g3.118.200827 (2019).
- 271 17 Mackay, T. F. *et al.* The *Drosophila melanogaster* Genetic Reference Panel. *Nature* **482**,  
272 173-178, doi:10.1038/nature10811 (2012).
- 273 18 Chrostek, E. & Teixeira, L. Mutualism breakdown by amplification of Wolbachia genes.  
274 *PLoS Biol* **13**, e1002065, doi:10.1371/journal.pbio.1002065 (2015).
- 275 19 Hamblin, M. T. & Aquadro, C. F. High nucleotide sequence variation in a region of low  
276 recombination in *Drosophila simulans* is consistent with the background selection  
277 model. *Mol Biol Evol* **13**, 1133-1140, doi:10.1093/oxfordjournals.molbev.a025676  
278 (1996).
- 279 20 Aquadro, C. F., Begun, D. J. & Kindahl, E. C. Selection, recombination, and DNA  
280 polymorphism in *Drosophila*. *Non-neutral evolution*, 46-56 (1994).
- 281 21 Truitt, A. M., Kapun, M., Kaur, R. & Miller, W. J. Wolbachia modifies thermal preference  
282 in *Drosophila melanogaster*. *Environ Microbiol*, doi:10.1111/1462-2920.14347 (2018).
- 283 22 Parsons, P. A. Evolutionary Rates - Effects of Stress Upon Recombination. *Biol J Linn Soc*  
284 **35**, 49-68, doi:DOI 10.1111/j.1095-8312.1988.tb00458.x (1988).
- 285 23 Turelli, M. *et al.* Rapid Global Spread of wRi-like Wolbachia across Multiple *Drosophila*.  
286 *Curr Biol* **28**, 963-971 e968, doi:10.1016/j.cub.2018.02.015 (2018).
- 287 24 Bordenstein, S. R., O'Hara, F. P. & Werren, J. H. Wolbachia-induced incompatibility  
288 precedes other hybrid incompatibilities in *Nasonia*. *Nature* **409**, 707-710,  
289 doi:10.1038/35055543 (2001).

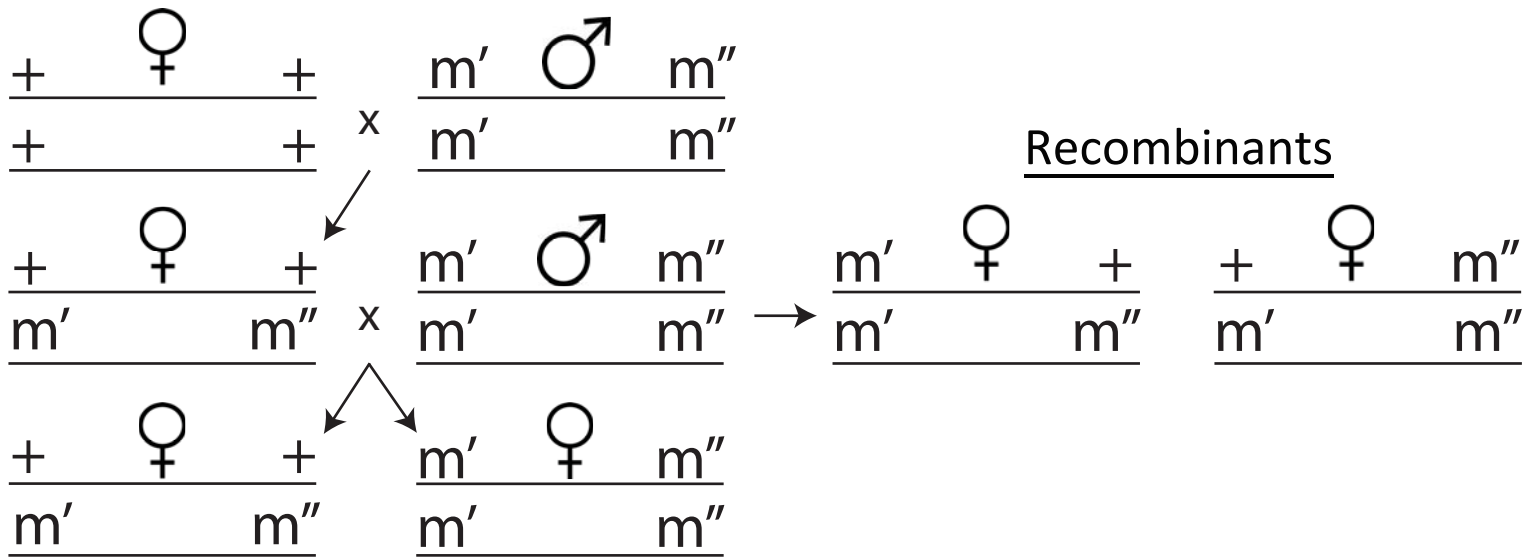

**Figure 1.** The crossing pattern used to track recombination events. ++ refers to wild type and m' m'' refers to genetic markers on each chromosome (y v on the X; vg bw on the 2nd; e ro on the 3rd). Recombination is tracked by looking at the ratio of recombinants to the total number of progeny produced.

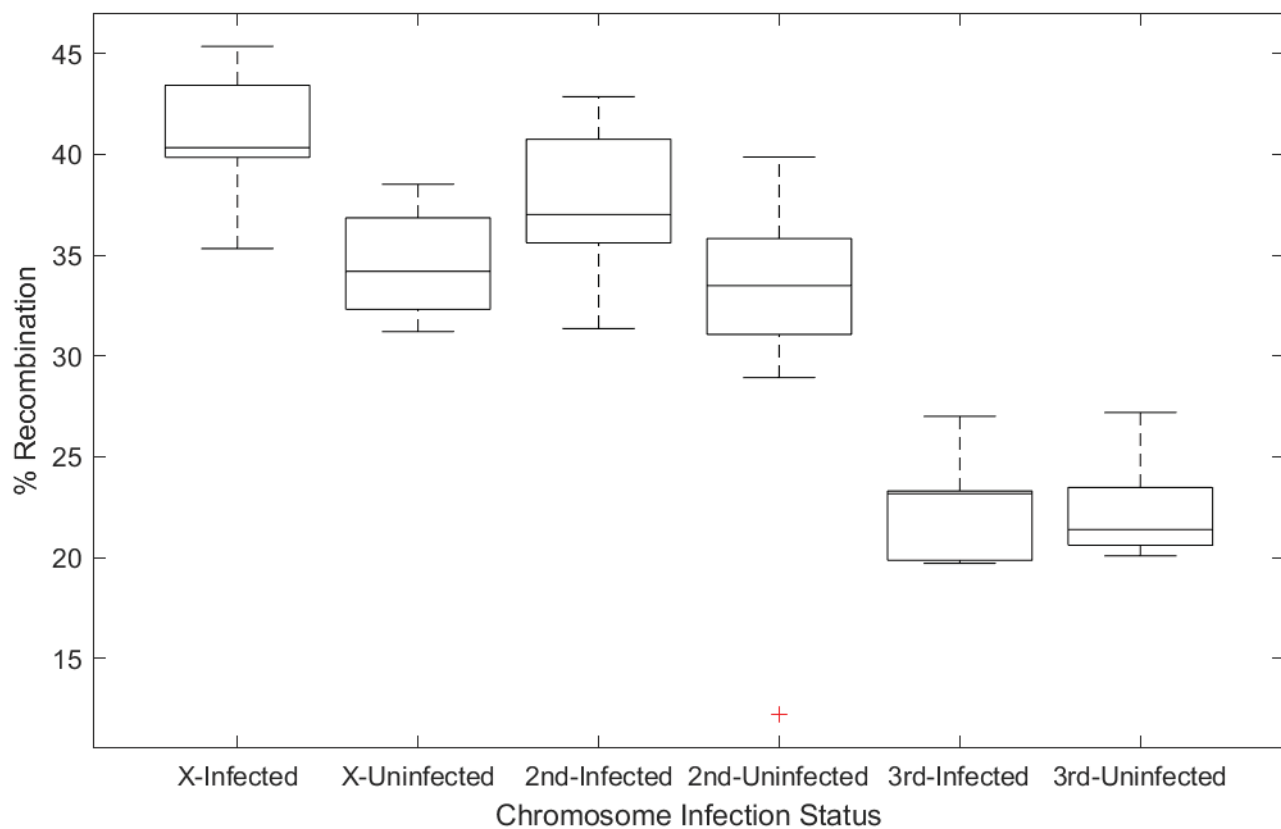

**Figure 2.** Percentage of recombinants observed, based on genetic markers on the X, 2nd, and 3rd chromosome of *Drosophila*. *Wolbachia* infection significantly increased the recombination rate observed on both the X and 2nd chromosome by 6.4 and 6.1%, respectively. One way ANOVA produced significance for the X (df = 17,  $\chi^2 = 16.084$ ,  $p < 6.058e^{-5}$ ) and the 2nd chromosome (df = 17,  $\chi^2 = 7.2357$ ,  $p < 0.007147$ ), but not on the 3rd chromosome (df = 14,  $\chi^2 = 0.080081$ ,  $p = 0.7772$ ).

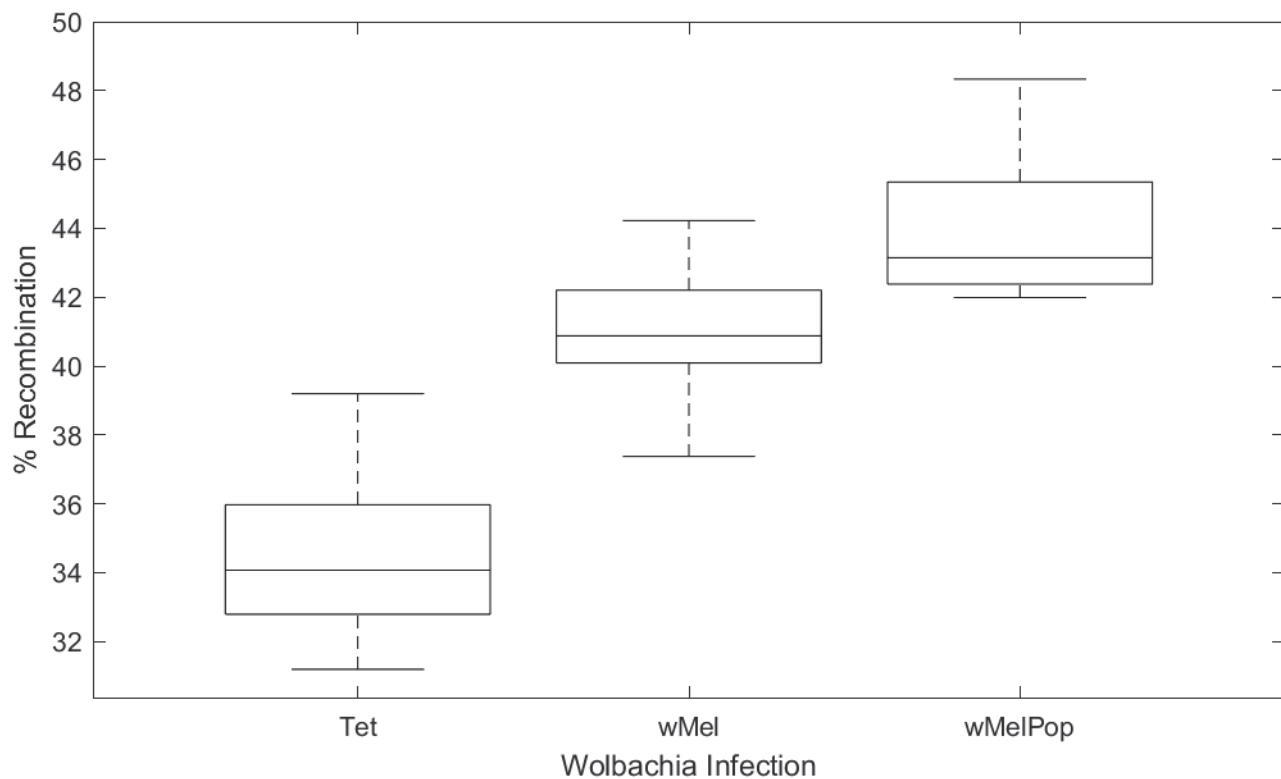

**Figure 3.** Percentage of recombinants observed, based on genetic markers on the X chromosome of *Drosophila*, when *Wolbachia* titer is varied. A uniform genetic background was used for comparisons across *Wolbachia*-uninfected (Tet) flies, *Wolbachia* infected (wMel) flies, and flies infected with a high-titer variant (wMelPop). Increased *Wolbachia* load increased recombination in a load-dependent manner by 6.3% for wMel and 9.5% for wMelPop. Significance between titer load was determined by one way ANOVA (df = 15,  $\chi^2 = 15.1495$ ,  $p = 0.0153$ ). Significance between Tet and wMel (df = 11,  $\chi^2 = 15.536$ ,  $p < 8.094e^{-5}$ ), wMel and wMelPop (df = 11,  $\chi^2 = 12.652$ ,  $p = 0.0442$ ), and Tet and wMelPop (df = 11,  $\chi^2 = 25.994$ ,  $p < 3.424e^{-7}$ ) was determined by one way ANOVA.

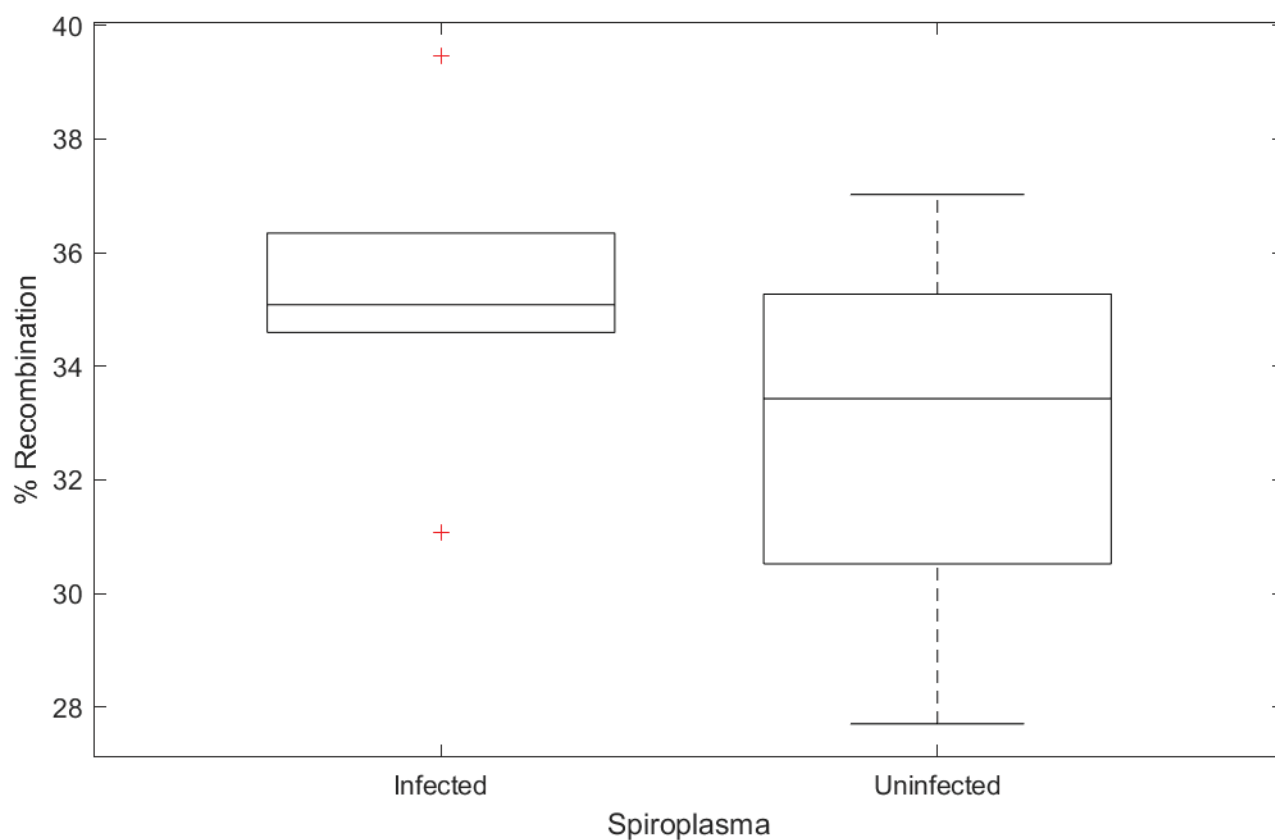

**Figure 4.** Percentage of recombinants observed based on genetic markers on the X chromosome of *Drosophila*. *Spiroplasma* infection did not significantly increase the observed recombination rate through one way ANOVA (df = 11,  $\chi^2 = 0.03885$ ,  $p = 0.2153$ ).
